# Supplementary material for: Simultaneous enrichment, separation and detection of mercury(ii) ions using cloud point extraction and colorimetric sensor based on thermoresponsive hyperbranched polymer–gold nanocomposite
Source: Royal Society of Chemistry journal article supplement (doi:10.1039/c5ay02406d), 2015-01-01
Supplement: c5ay02406d2.pdf [file c5ay02406d2.pdf]

## Supporting Information

# Simultaneous Enrichment, Separation and Detection of Mercury (II) Ions Using Cloud Point Extraction and Colorimetric Sensor Based on Thermoresponsive Hyperbranched Polymer-Gold Nanocomposite

*Yi Liu, Li Xu, Junshen Liu, Xunyong Liu\**

School of Chemistry and Materials Science, Ludong University, 264025 Yantai, Shandong Province,

People's Republic of China

E-mail: xunyongliu@126.com

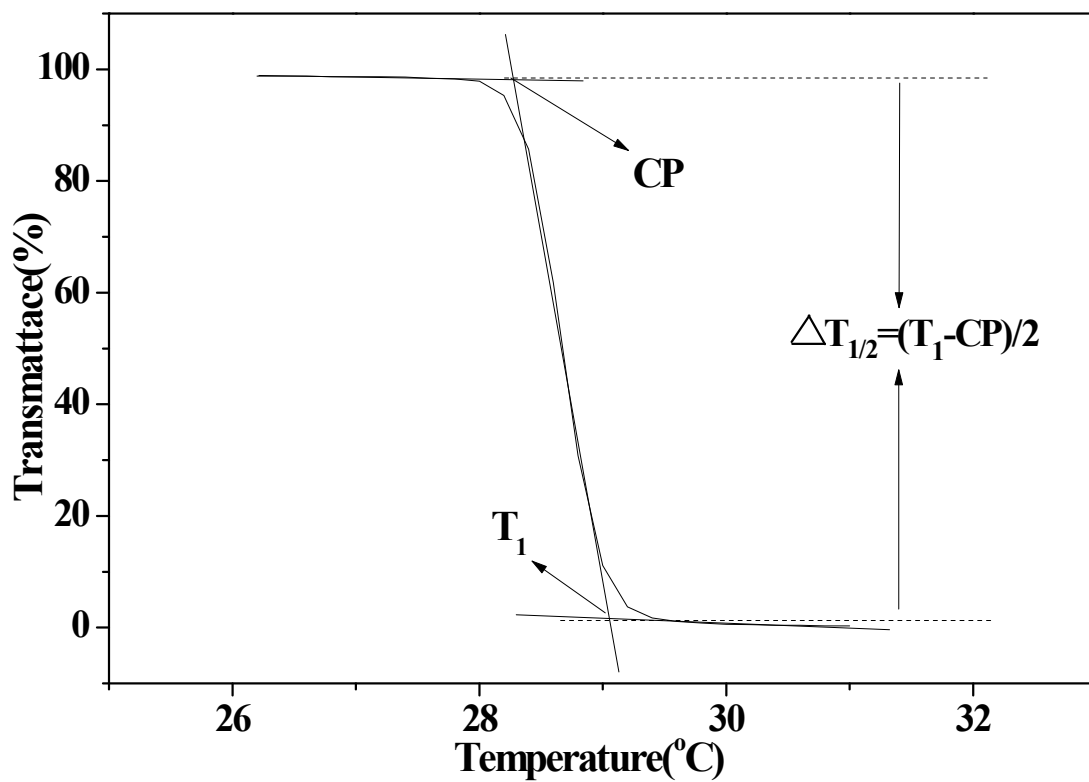

Fig. S1 The typical curve of temperature effect on the light transmittance of the aqueous solution of HPEI-IBAm.

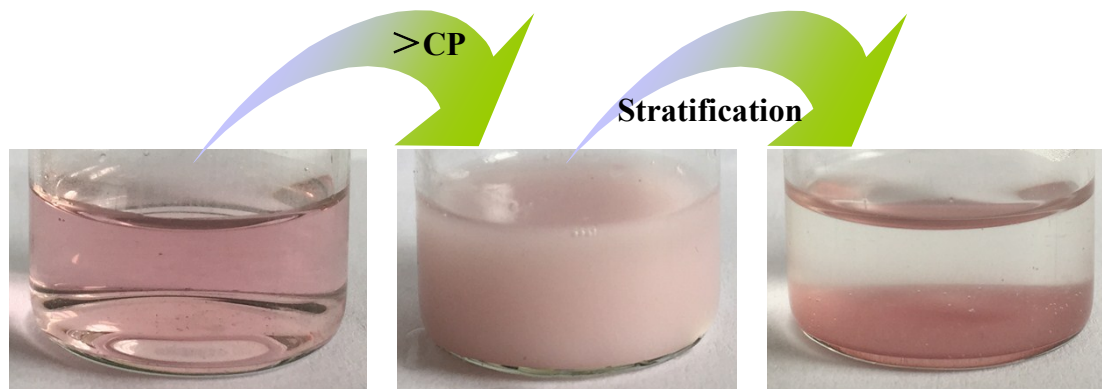

Fig. S2 The process of enriching and separating Hg<sup>2+</sup> via heating and stratification.

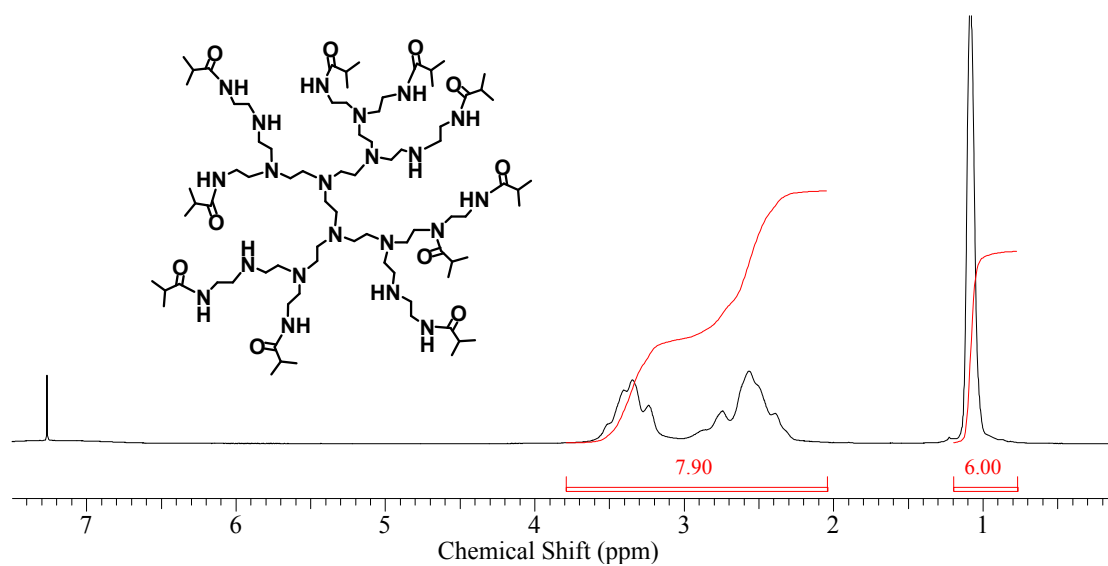

Fig. S3  $^1\text{H}$  NMR spectra of HPEI-IBAm.

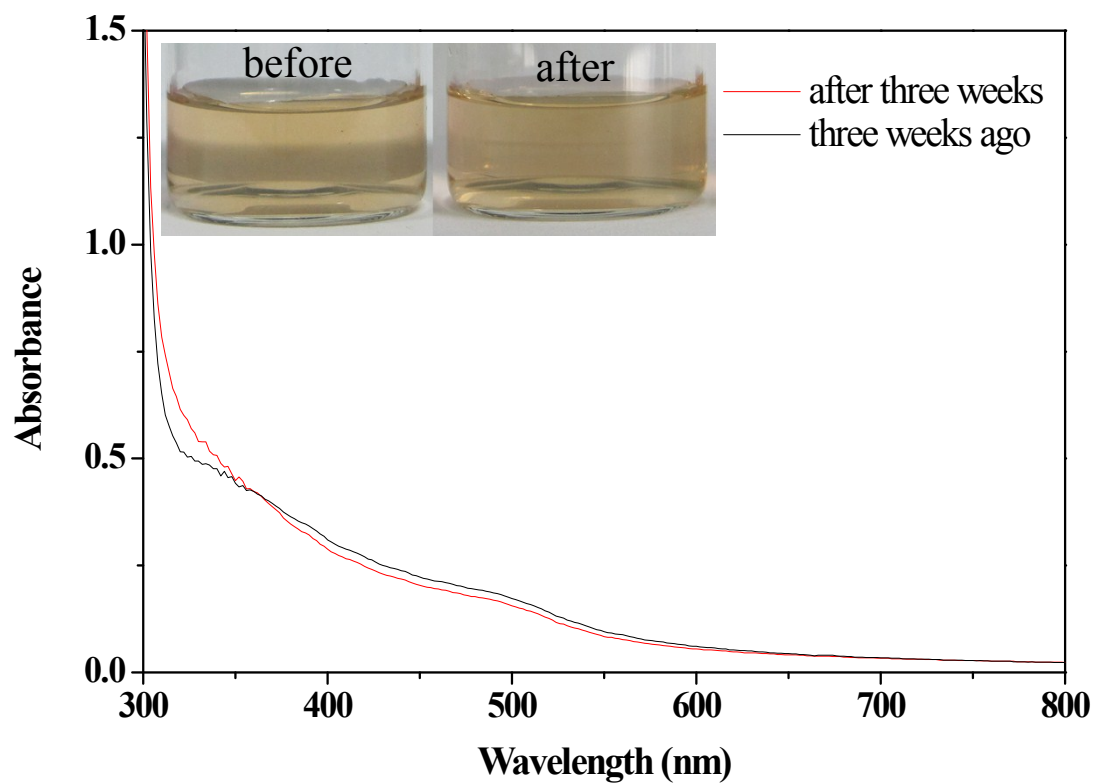

Fig. S4 The absorption spectra of Au-Hg nanoparticles in 2 minutes (black line) and three weeks (red line) after preparation; Inset shows the color change before and after three weeks. (0.6 nM HPEI-IBAm-AuNPs with 6.3 mM AA in the presence of 4.38  $\mu\text{M}$   $\text{Hg}^{2+}$ )

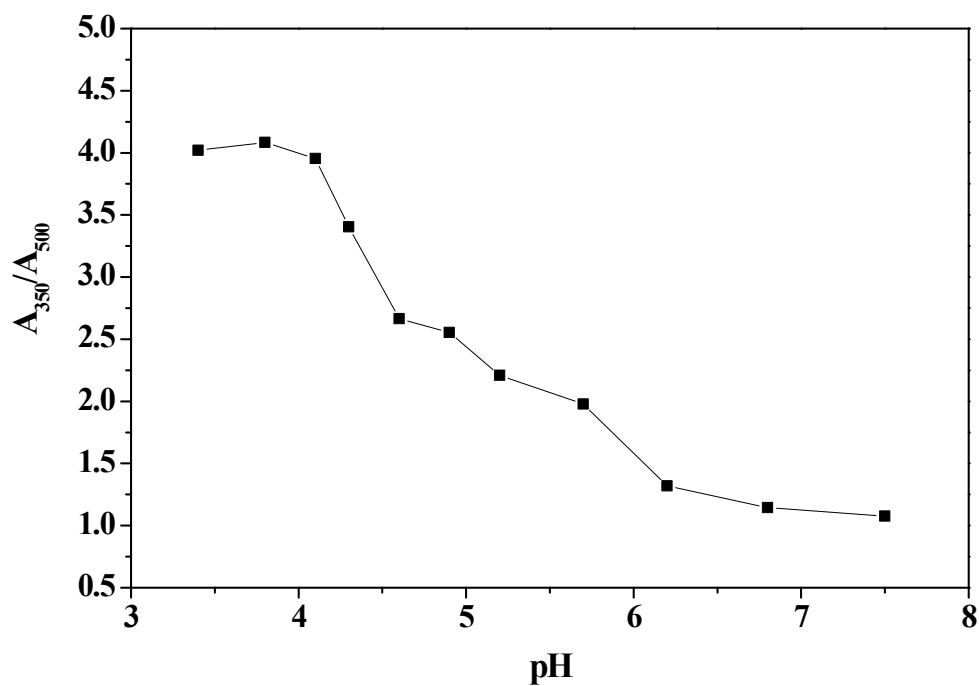

Fig. S5 Effect of the pH on the response ( $A_{350}/A_{500}$ ) of 0.6 nM HPEI-IBAm-AuNPs in the presence of  $4.38 \mu\text{M Hg}^{2+}$ .

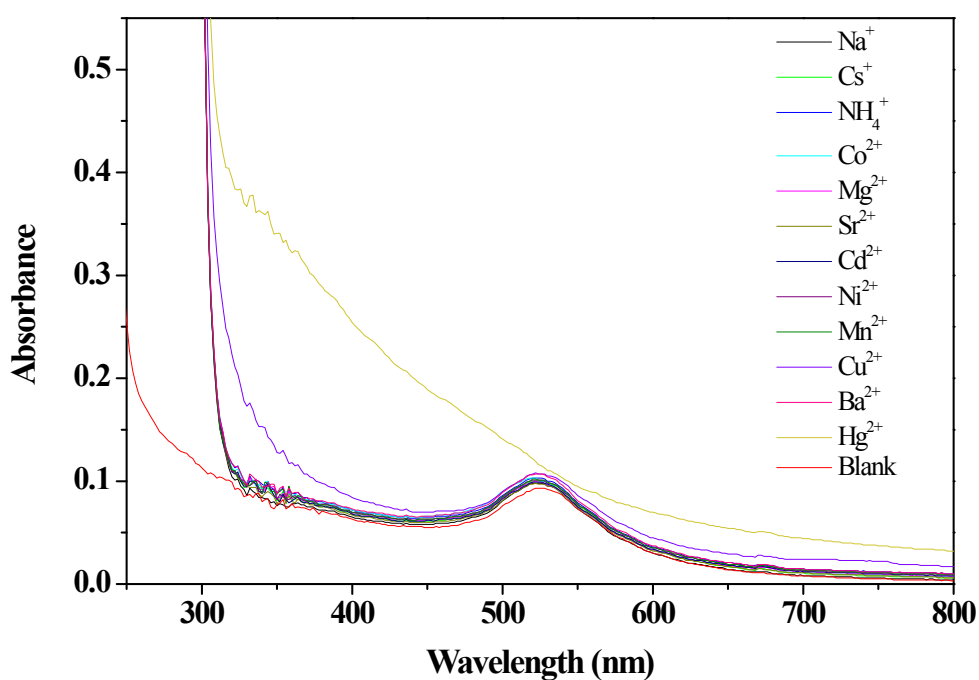

Fig. S6 Selectivity of the sensor: Absorption spectra of the colorimetric assay containing HPEI-IBAm-AuNPs (0.3 nM) and AA (20.2 mM) solutions with  $\text{Hg}^{2+}$  ( $4.38 \mu\text{M}$ ) and several other metal ions ( $43.8 \mu\text{M}$ ).

Table S1 Gold nanoparticle-based sensors for Hg<sup>2+</sup> detection

| Probe                                                       | Detection techniques       | LOD(nM)                                 | Time (min)    | Ref       |
|-------------------------------------------------------------|----------------------------|-----------------------------------------|---------------|-----------|
| DNA/AuNPs                                                   | Colorimetry and absorption | 100                                     | 4-10          | 1         |
| Tween 20-AuNPs                                              | Colorimetry and absorption | 100                                     | 5             | 2         |
| MPA-Hcys-PDCA/AuNPs                                         | Hyper Rayleigh Scattering  | 25                                      | 6-7           | 3         |
| Tween 20-AuNPs                                              | Colorimetry and absorption | 5                                       | 3             | 4         |
| PDDA/AuNPs                                                  | Absorption                 | 25                                      | No mention    | 5         |
| HAuCl <sub>4</sub> /NH <sub>2</sub> OH                      | Absorption                 | 10                                      | 15-20 min     | 6         |
| CTAB-coated nanogold                                        | Colorimetry and absorption | 1 μM (naked eyes) and 30 nM (UV-vis)    | 5             | 7         |
| DTET-AuNPs                                                  | Colorimetry and absorption | 100                                     | 10 min        | 8         |
| Oligopeptides-AuNPs                                         | Colorimetry and absorption | 10                                      | No mention    | 9         |
| Oligonucleotide-AuNPs/DNA                                   | Colorimetry and absorption | 1                                       | 20 min        | 10        |
| DNA/Nanoparticle Conjugates                                 | Colorimetry and absorption | 3 μM (naked eyes) and 1 μM (UV-vis)     | 5 min         | 11        |
| Graphene/AuNPs                                              | Colorimetry and absorption | 16                                      | 0.5           | 12        |
| O-phenylenediamine/AuNPs                                    | Colorimetry and absorption | 0.1 μM (naked eyes) and 5 nM (UV-vis)   | 3-40 min      | 13        |
| DPy/AuNPs                                                   | Colorimetry and absorption | 15                                      | 30 min        | 14        |
| QA-AuNPs                                                    | Colorimetry and absorption | 30                                      | No mention    | 15        |
| Hyperbranched polyethylenimine derivatives stabilized AuNPs | Colorimetry and absorption | 8.8 nM (naked eyes) and 1.1 nM (UV-vis) | Less than 0.5 | This work |

## References

- (1) Lee, J. S.; Han, M. S.; Mirkin, C. A., Colorimetric Detection of Mercuric Ion ( $\text{Hg}^{2+}$ ) in Aqueous Media using DNA-Functionalized Gold Nanoparticles. *Angew. Chem. Int. Ed.* **2007**, *46*, 4093-4096.
- (2) Lin, C. Y.; Yu, C. J.; Lin, Y. H.; Tseng, W. L., Colorimetric Sensing of Silver(I) and Mercury(II) Ions Based on an Assembly of Tween 20-Stabilized Gold Nanoparticles. *Anal. Chem.* **2010**, *82*, 6830-6837.
- (3) Darbha, G. K.; Singh, A. K.; Rai, U. S.; Yu, E.; Yu, H.; Chandra Ray, P., Selective Detection of Mercury (II) Ion Using Nonlinear Optical Properties of Gold Nanoparticles. *J. Am. Chem. Soc.* **2008**, *130*, 8038-8043.
- (4) Lou, T. T.; Chen, Z. P.; Wang, Y. Q.; Chen, L. X., Blue-to-Red Colorimetric Sensing Strategy for  $\text{Hg}^{2+}$  and  $\text{Ag}^+$  via Redox-Regulated Surface Chemistry of Gold Nanoparticles. *ACS Appl. Mater. Interfaces* **2011**, *3*, 1568-1573.
- (5) Ding, N.; Zhao, H.; Peng, W.; He, Y.; Zhou, Y.; Yuan, L.; Zhang, Y., A simple colorimetric sensor based on anti-aggregation of gold nanoparticles for  $\text{Hg}^{2+}$  detection. *Colloids and Surfaces A: Physicochem. Eng. Aspects* **2012**, *395*, 161-167.
- (6) Fan, A.; Ling, Y.; Lau, C.; Lu, J., Direct colorimetric visualization of mercury ( $\text{Hg}^{2+}$ ) based on the formation of gold nanoparticles. *Talanta* **2010**, *82*, 687-692.
- (7) Jin, L. H.; Han, C. S., Eco-friendly colorimetric detection of mercury(II) ions using label-free anisotropic nanogolds in ascorbic acid solution. *Sensors Actuators B: Chem.* **2014**, *195*, 239-245.
- (8) Kim, Y. R.; Mahajan, R. K.; Kim, J. S.; Kim, H., Highly Sensitive Gold

Nanoparticle-Based Colorimetric Sensing of Mercury(II) through Simple Ligand Exchange Reaction in Aqueous Media. *ACS Appl. Mat. Interfaces* **2010**, *2*, 292-295.

(9) Du, J.; Sun, Y.; Jiang, L.; Cao, X.; Qi, D.; Yin, S.; Ma, J.; Boey, F. Y. C.; Chen, X., Flexible Colorimetric Detection of Mercuric Ion by Simply Mixing Nanoparticles and Oligopeptides. *Small* **2011**, *7*, 1407-1411.

(10) Li, D.; Wieckowska, A.; Willner, I., Optical Analysis of Hg<sup>2+</sup> Ions by Oligonucleotide-Gold-Nanoparticle Hybrids and DNA-Based Machines. *Angew. Chem. Int. Ed.* **2008**, *47*, 3927-3931.

(11) Xue, X.; Wang, F.; Liu, X., One-Step, Room Temperature, Colorimetric Detection of Mercury (Hg<sup>2+</sup>) Using DNA/Nanoparticle Conjugates. *J. Am. Chem. Soc.* **2008**, *130*, 3244-3245.

(12) Yan, Z.; Xue, H.; Berning, K.; Lam, Y. W.; Lee, C. S., Identification of Multifunctional Graphene-Gold Nanocomposite for Environment-Friendly Enriching, Separating, and Detecting Hg<sup>2+</sup> Simultaneously. *ACS Appl. Mat. Interfaces* **2014**, *6*, 22761-22768.

(13) Li, Y. L.; Leng, Y.-M.; Zhang, Y.-J.; Li, T. H.; Shen, Z. Y.; Wu, A. G., A new simple and reliable Hg<sup>2+</sup> detection system based on anti-aggregation of unmodified gold nanoparticles in the presence of O-phenylenediamine. *Sensors Actuators B: Chem.* **2014**, *200*, 140-146.

(14) Li, Y.; Wu, P.; Xu, H.; Zhang, Z.; Zhong, X., Highly selective and sensitive visualizable detection of Hg<sup>2+</sup> based on anti-aggregation of gold nanoparticles. *Talanta* **2011**, *84*, 508-512.

(15)Liu, D.; Qu, W.; Chen, W.; Zhang, W.; Wang, Z.; Jiang, X., Highly Sensitive, Colorimetric Detection of Mercury(II) in Aqueous Media by Quaternary Ammonium Group-Capped Gold Nanoparticles at Room Temperature. *Anal. Chem.* **2010**, *82*, 9606-9610.
